# Supplementary material for: O-Alkyl derivatives of ferulic and syringic acid as lipophilic antioxidants: effect of the length of the alkyl chain on the improvement of the thermo-oxidative stability of sunflower oil
Source: Royal Society of Chemistry journal article supplement (doi:10.1039/d4ra01638f), 2024-01-01
Supplement: d4ra01638f1.pdf [file d4ra01638f1.pdf]

## Supplementary Information

### ***O*-alkyl derivatives of ferulic and syringic acid as lipophilic antioxidants: Effect of the length of the alkyl chain in the improvement of the thermo-oxidative stability of sunflower oil**

Oscar Forero-Doria<sup>1,2</sup>, Luis Guzmán<sup>3</sup>, Whitney Venturini<sup>4</sup>, Felipe Zapata-Gomez<sup>3</sup>, Yorley Duarte<sup>5</sup>,  
Lorena Camargo-Ayala<sup>6</sup>, Cesar Echeverria<sup>7</sup>, Javier Echeverría<sup>1\*</sup>

<sup>1</sup>Departamento de Ciencias del Ambiente, Facultad de Química y Biología, Universidad de Santiago de Chile, Santiago, Chile

<sup>2</sup>Departamento de Ciencias Básicas, Facultad de Ciencias, Universidad Santo Tomás, Talca 3460000, Chile

<sup>3</sup>Departamento de Bioquímica Clínica e Inmunohematología, Facultad de Ciencias de la Salud, Universidad de Talca, Talca, Maule, Chile

<sup>4</sup>Departamento de Ciencias Pre-Clinicas, Facultad de Medicina, Universidad Católica del Maule, Talca, Chile

<sup>5</sup>Center for Bioinformatics and Integrative Biology, Facultad de Ciencias de la Vida, Universidad Andrés Bello, Av. República 330, Santiago 8370146, Chile

<sup>6</sup>Laboratorio de Síntesis Orgánica y Actividad Biológica (LSO-Act-Bio), Instituto de Química de Recursos Naturales, Universidad de Talca, Casilla 747, Talca 3460000, Chile

<sup>7</sup>ATACAMA-OMICS, Laboratorio de Biología Molecular y Genómica, Facultad de Medicina, Universidad de Atacama, 1532502, Copiapó, Chile.

Correspondence: [javier.echeverriam@usach.cl](mailto:javier.echeverriam@usach.cl); Tel.: +56-2-27181154

# I. $^1\text{H}$ and $^{13}\text{C}$ -NMR spectra

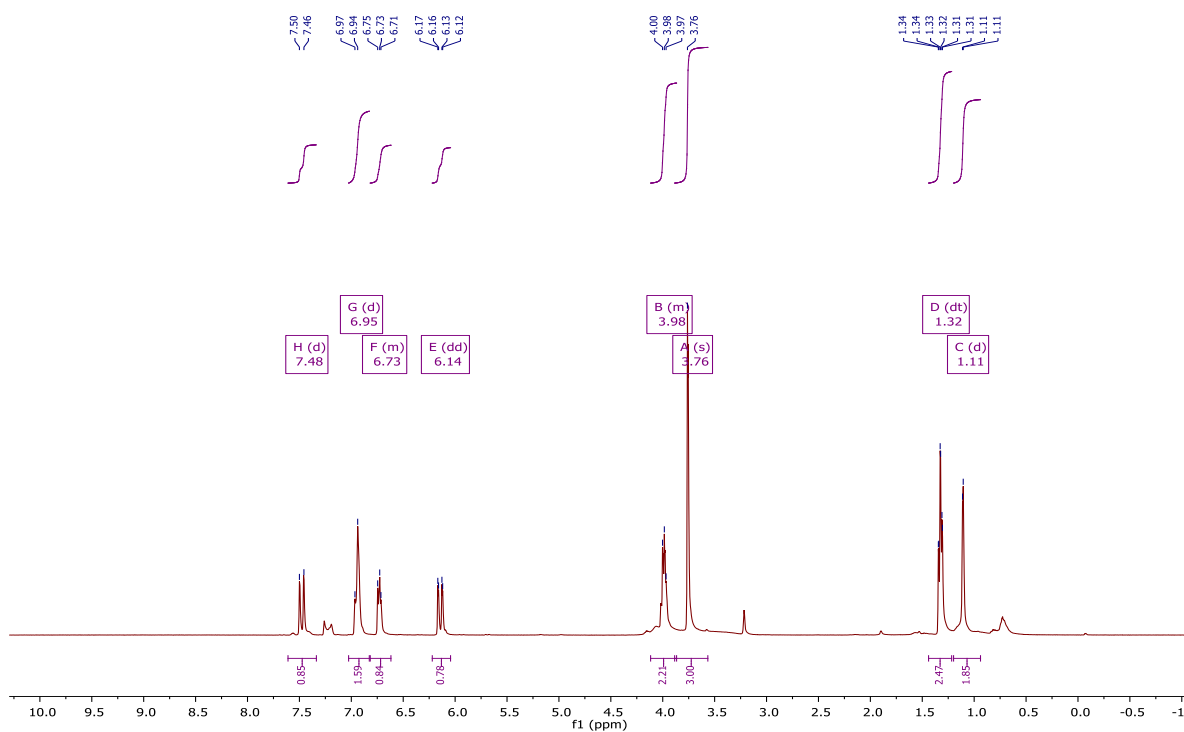

Figure S1.  $^1\text{H}$ -NMR spectrum of ferulic acid 4-ethyl ether (**3a**).

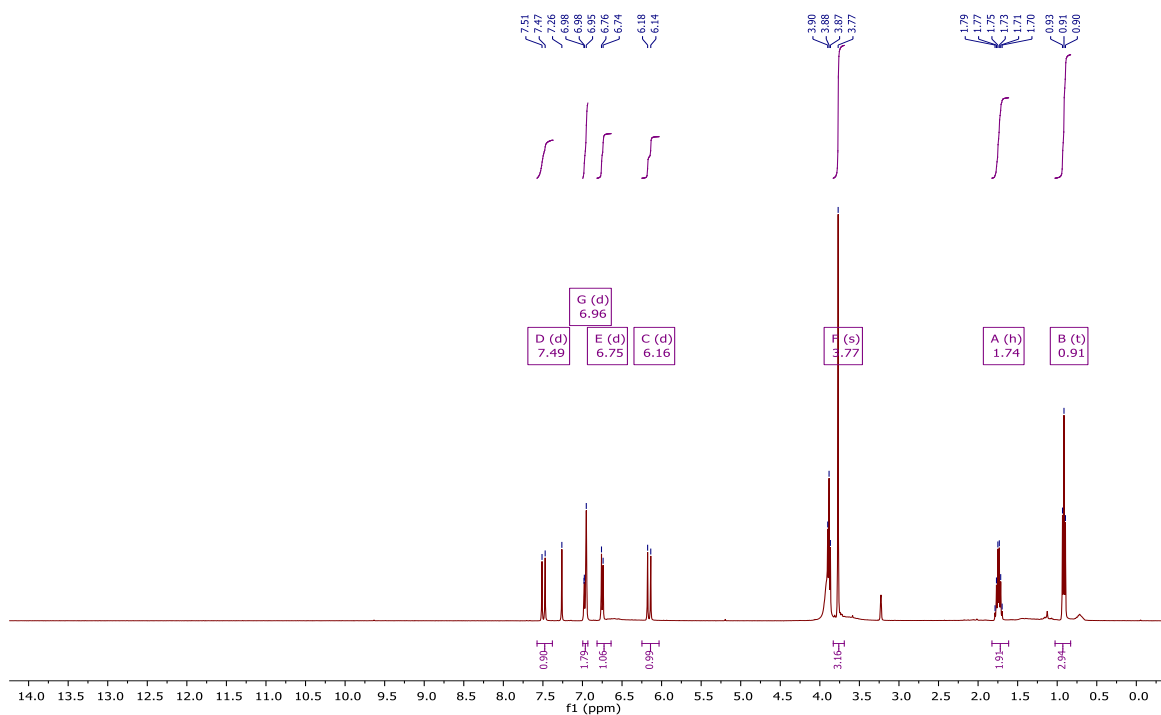

Figure S2.  $^1\text{H}$ -NMR spectrum of ferulic acid 4-propyl ether (**3b**).

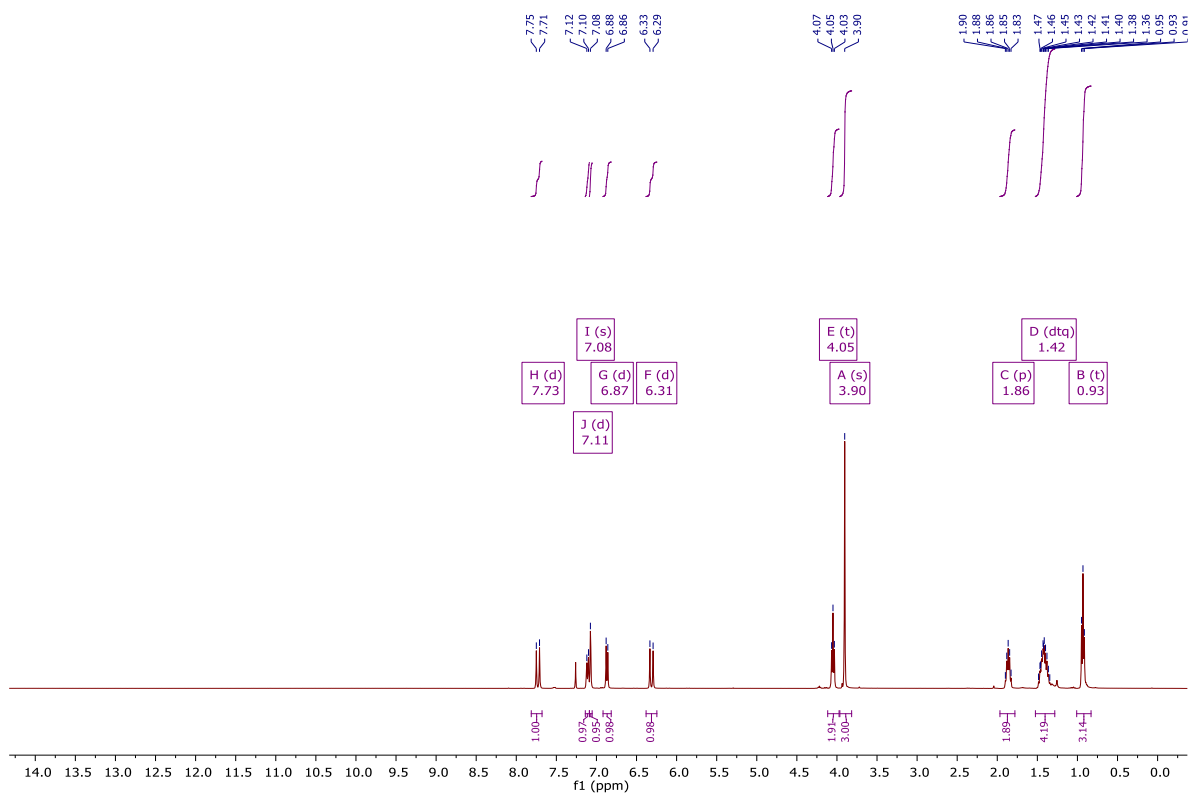

**Figure S3.**  $^1\text{H}$ -NMR spectrum of ferulic acid 4-pentyl ether (**3c**).

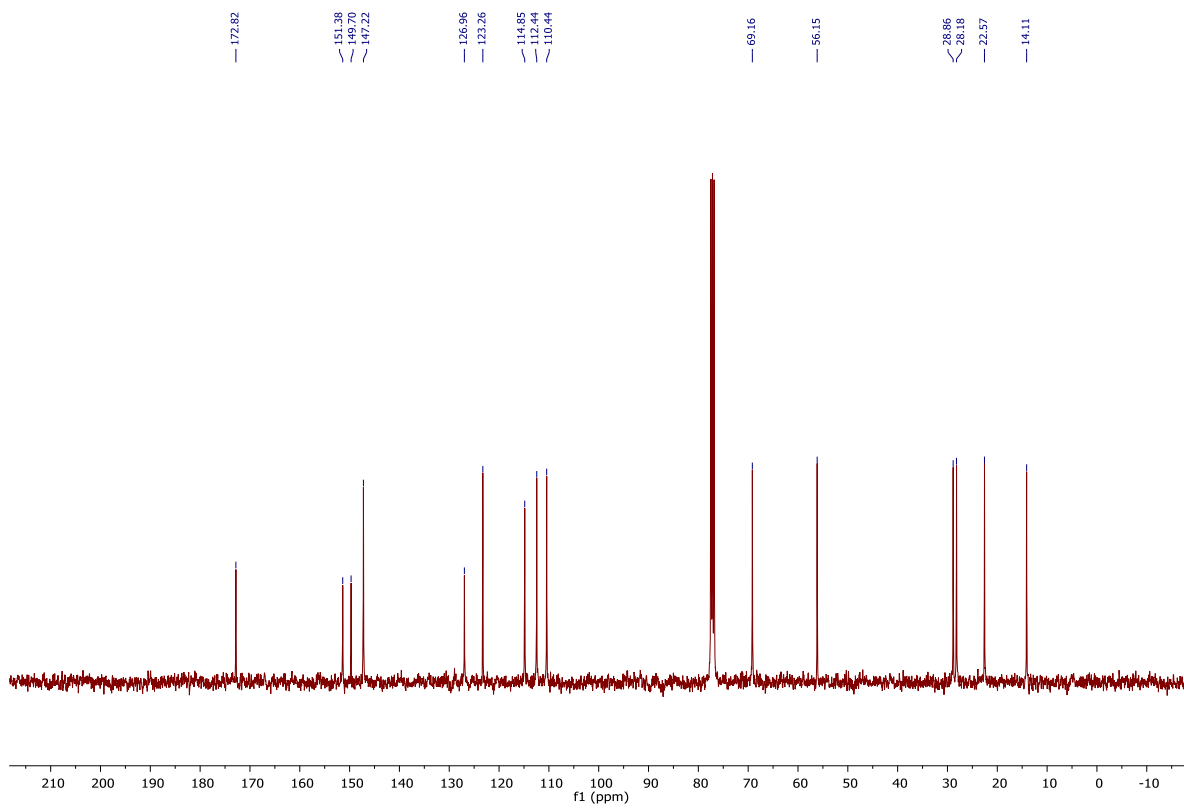

**Figure S4.**  $^{13}\text{C}$ -NMR spectrum of ferulic acid 4-pentyl ether (**3c**).

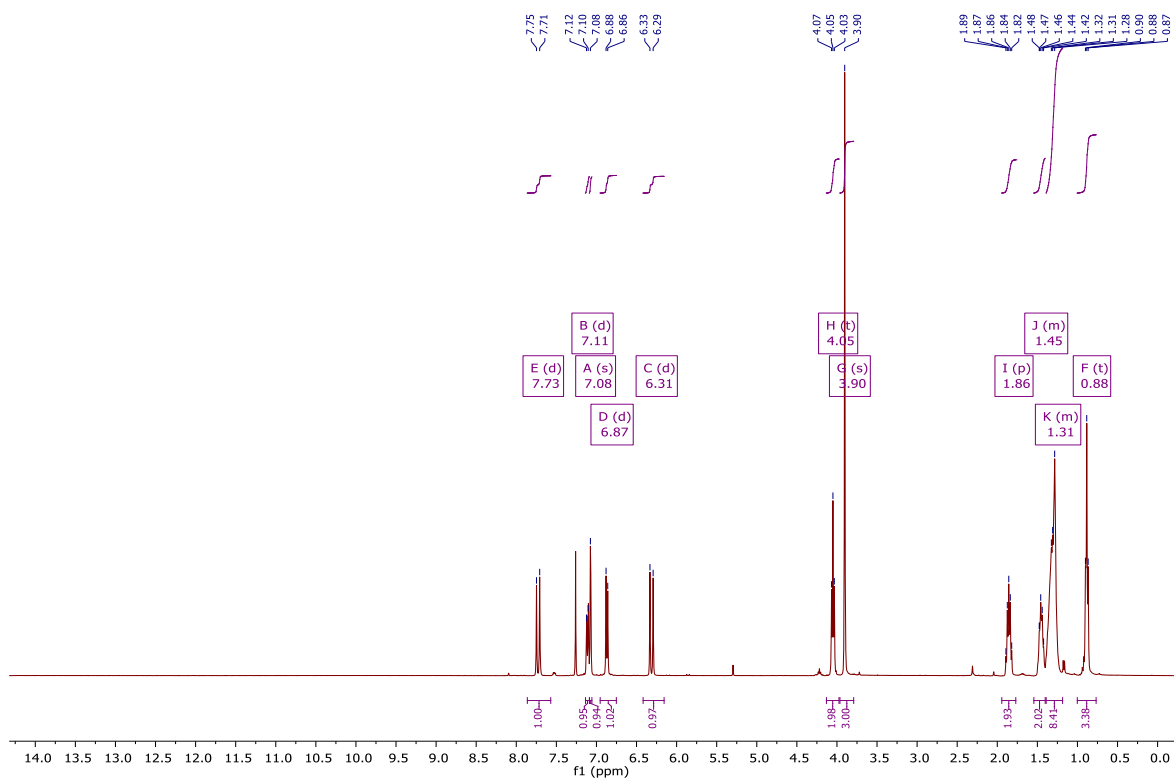

**Figure S5.**  $^1\text{H}$ -NMR spectrum of ferulic acid 4-hexyl ether (**3d**).

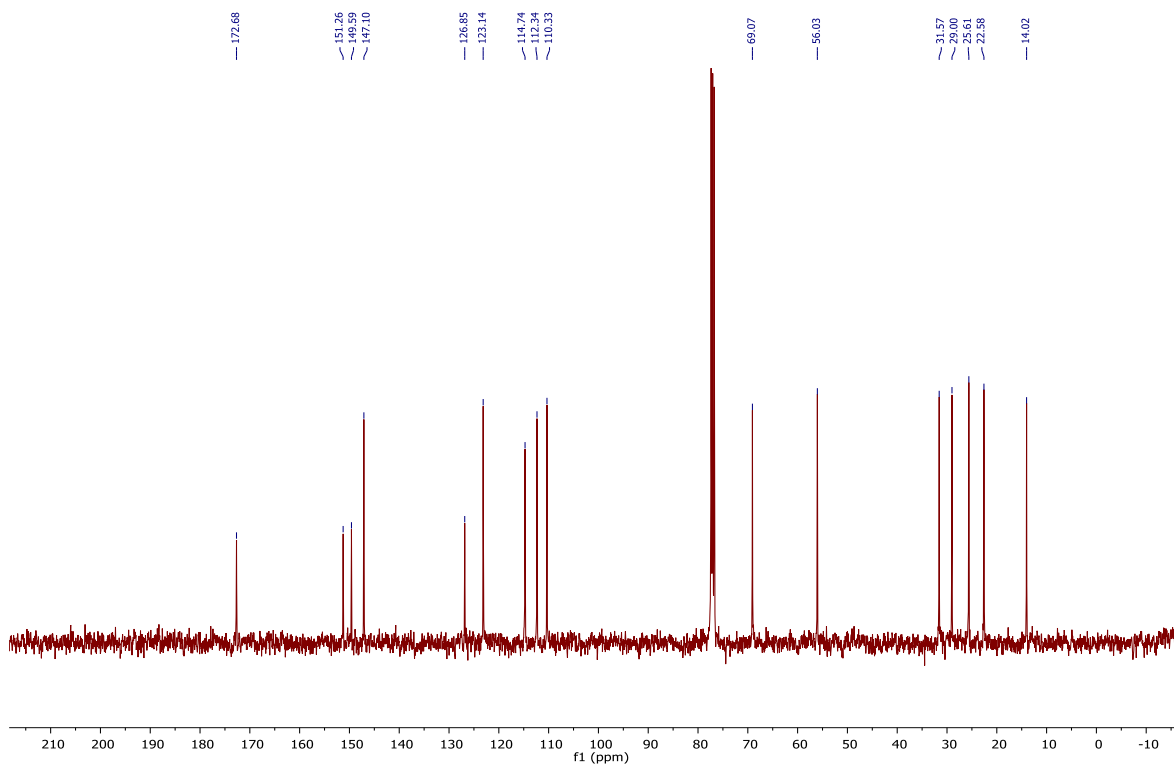

**Figure S6.**  $^{13}\text{C}$ -NMR spectrum of ferulic acid 4-hexyl ether (**3d**).

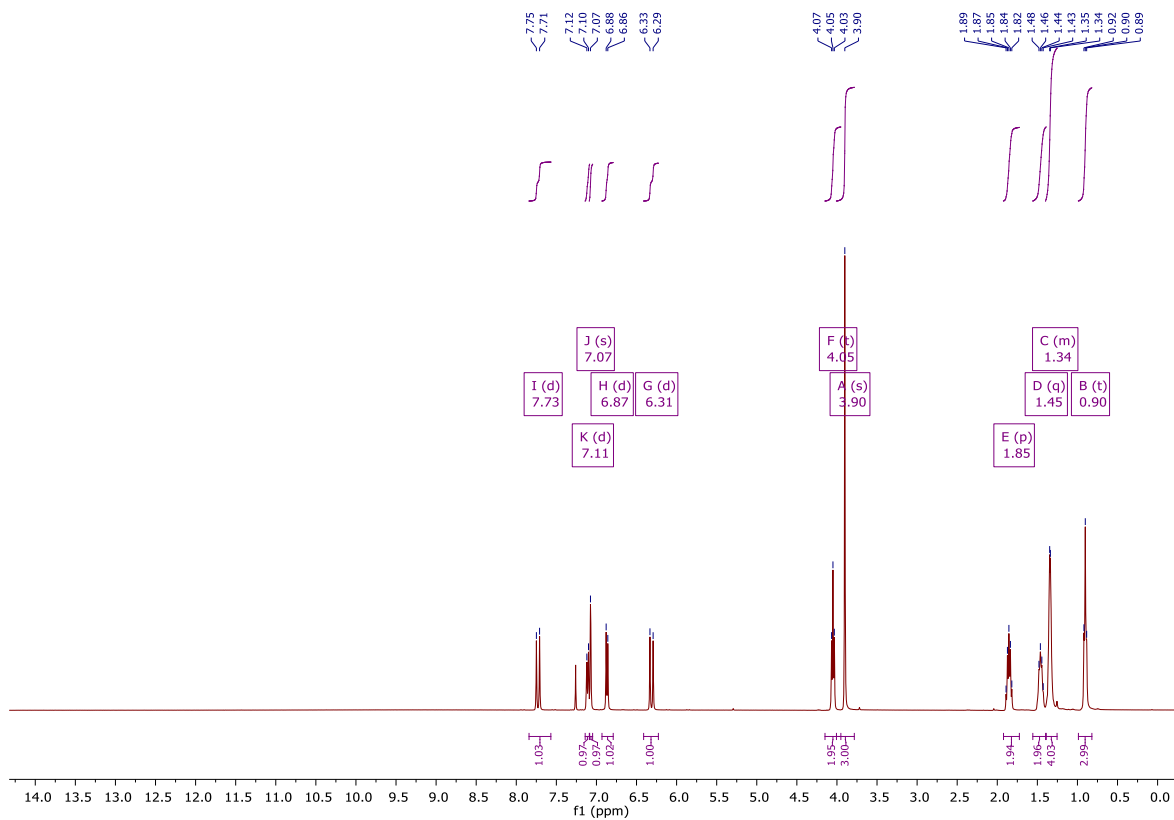

**Figure S7.**  $^1\text{H}$ -NMR spectrum of ferulic acid 4-octyl ether (**3e**).

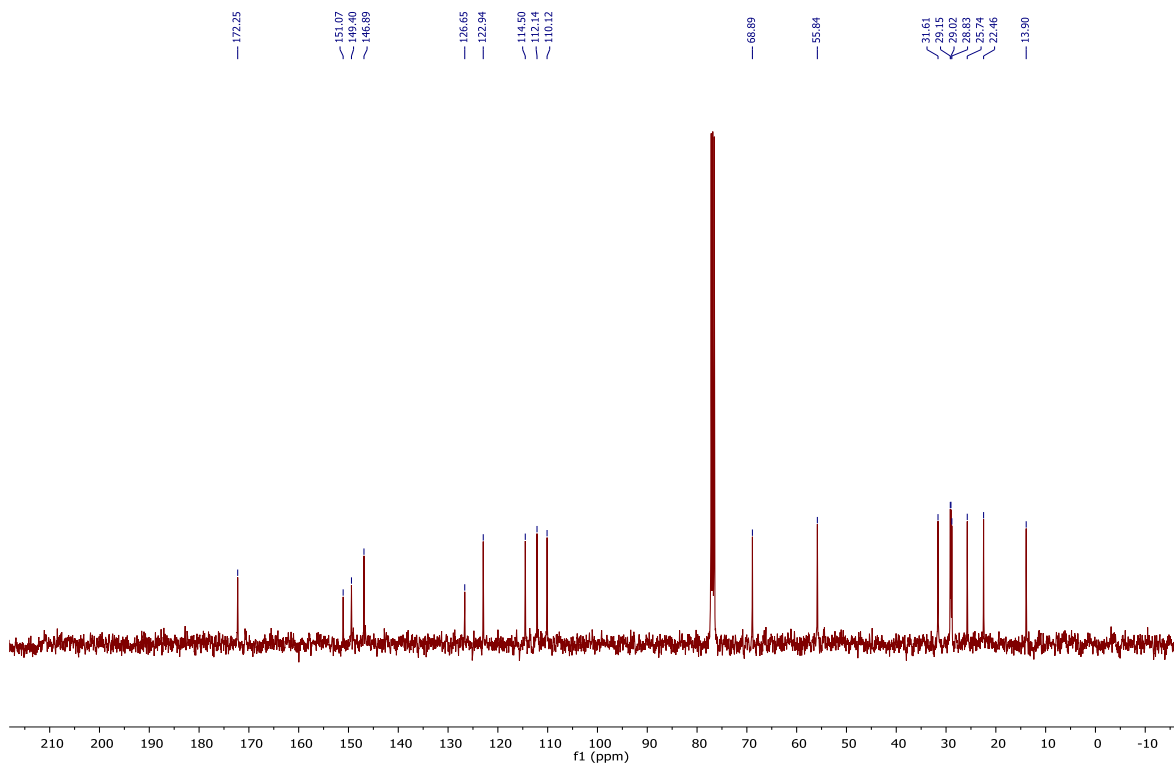

**Figure S8.**  $^{13}\text{C}$ -NMR spectrum of ferulic acid 4-octyl ether (**3e**).

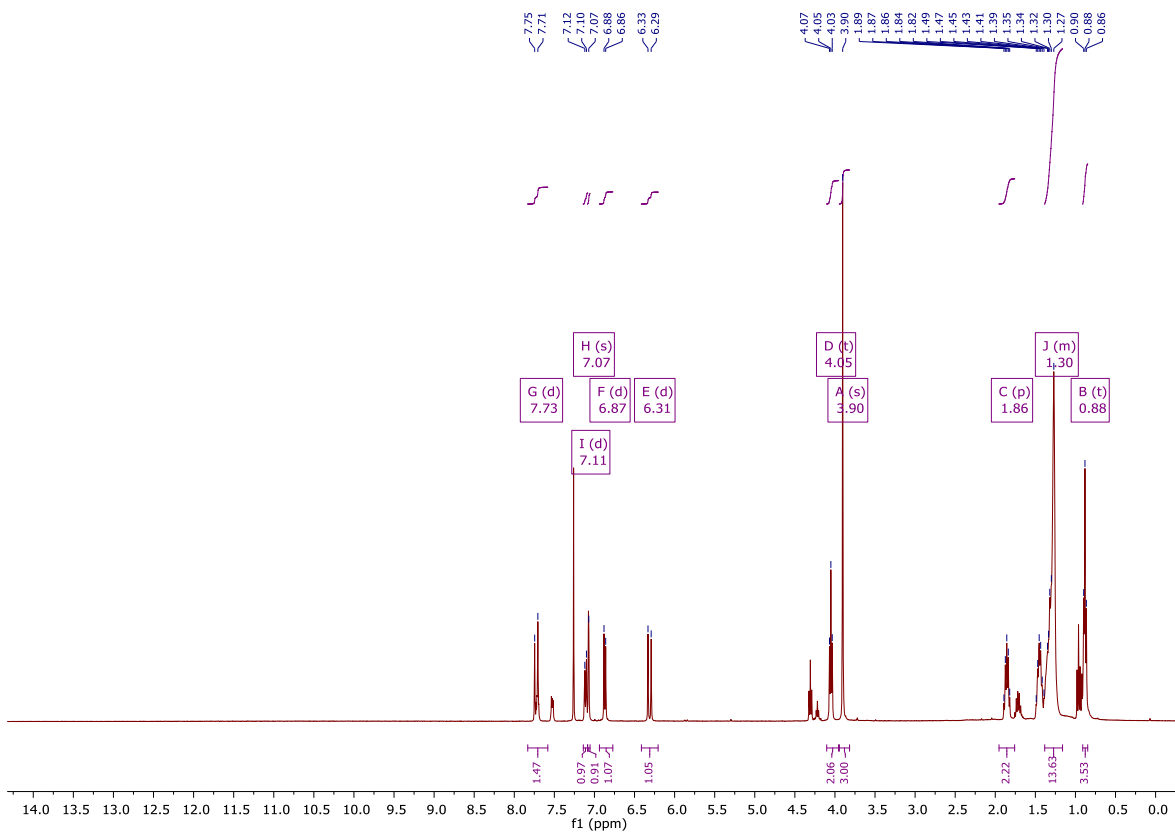

**Figure S9.**  $^1\text{H}$ -NMR spectrum of ferulic acid 4-decyl ether (**3f**).

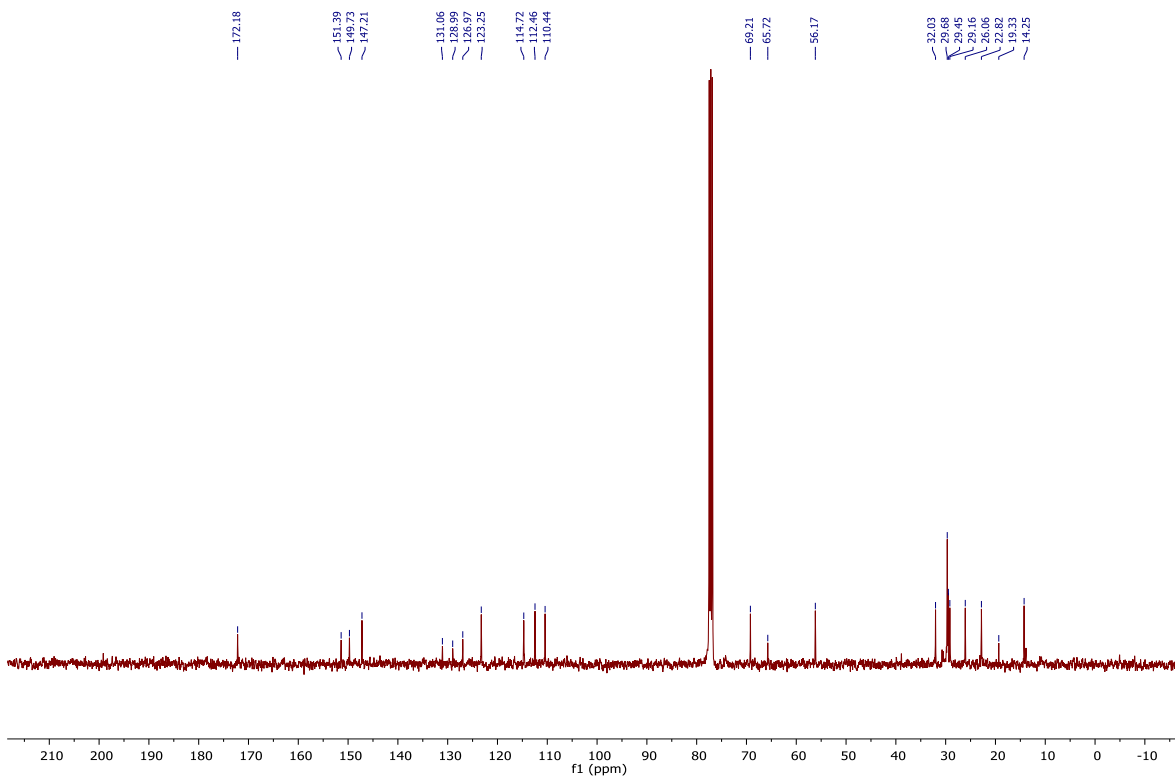

**Figure S10.**  $^{13}\text{C}$ -NMR spectrum of ferulic acid 4-decyl ether (**3f**).

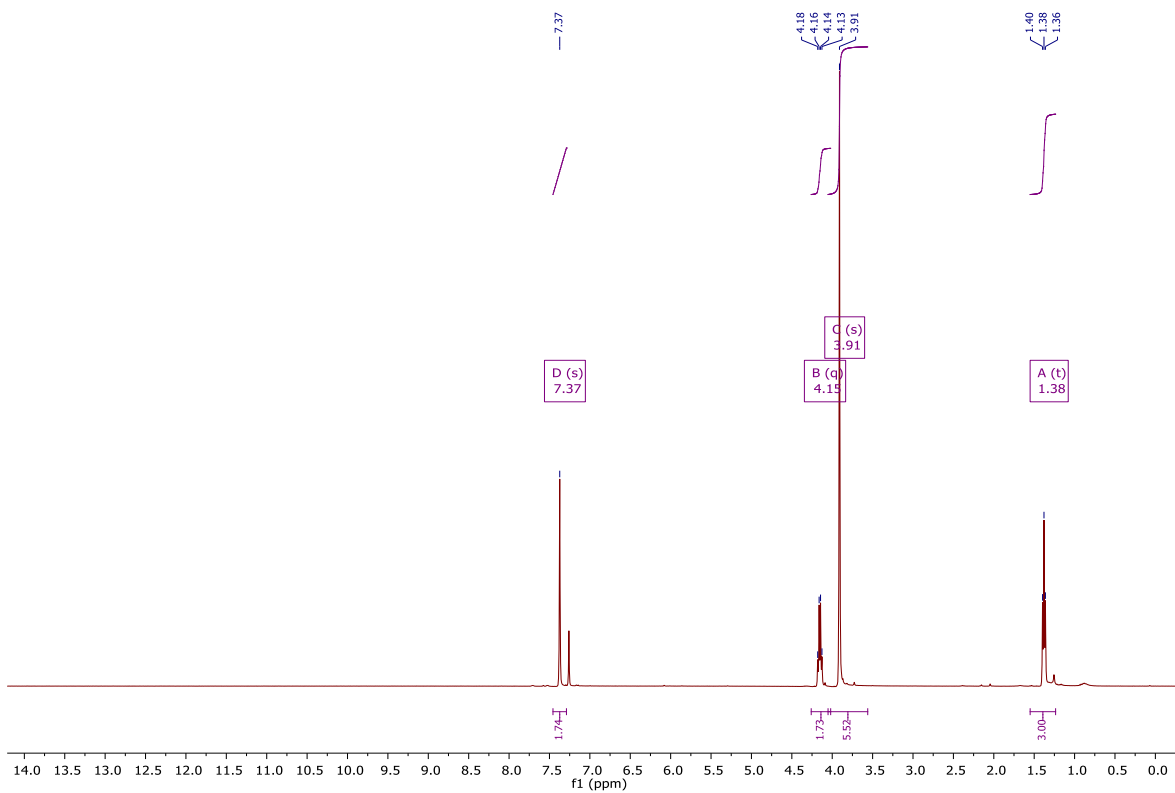

**Figure S11.** <sup>1</sup>H-NMR spectrum of syringic acid 4-ethyl ether (**5a**).

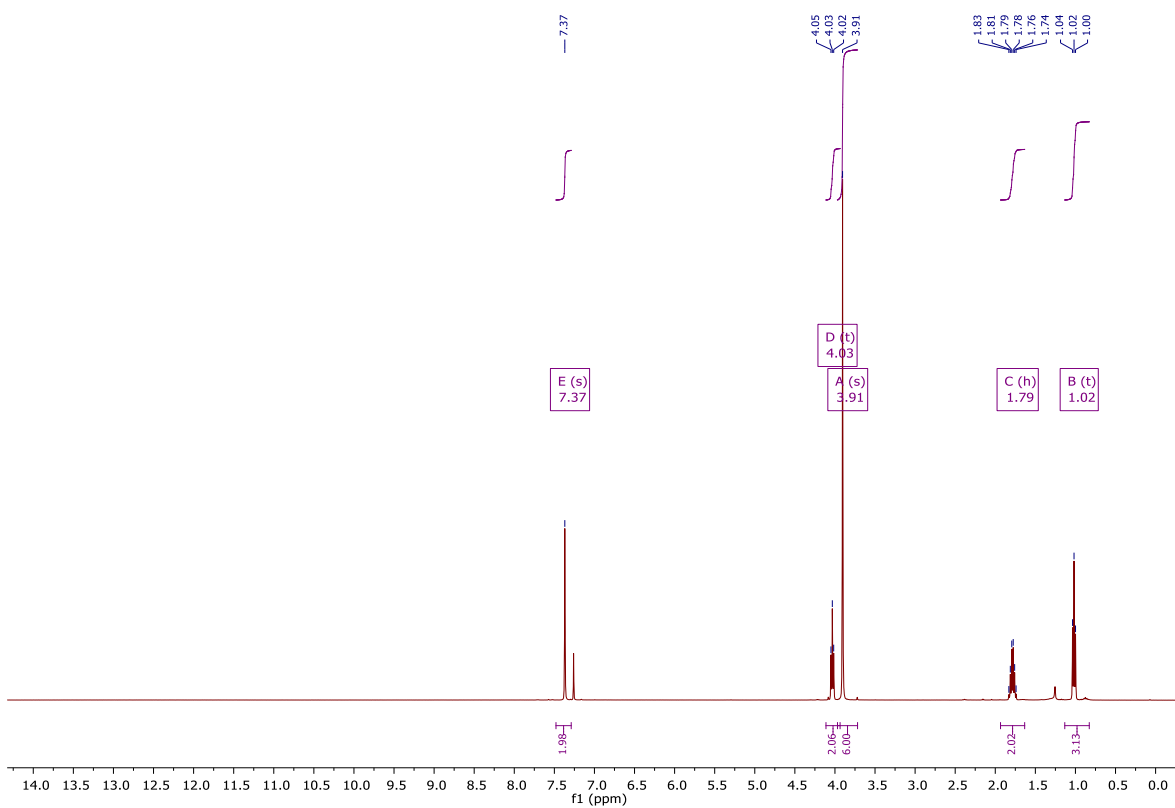

**Figure S12.** <sup>1</sup>H-NMR spectrum of syringic acid 4-propyl ether (**5b**).

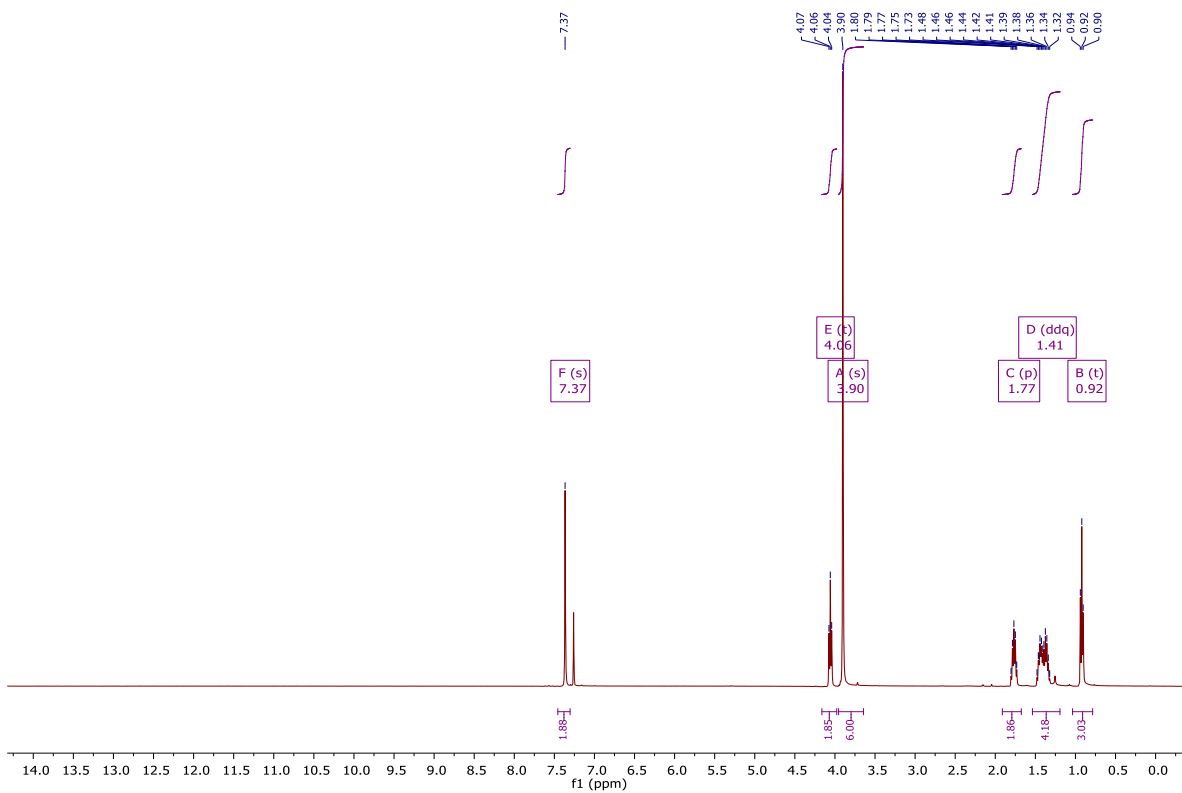

**Figure S13.**  $^1\text{H}$ -NMR spectrum of syringic acid 4-pentyl ether (**5c**).

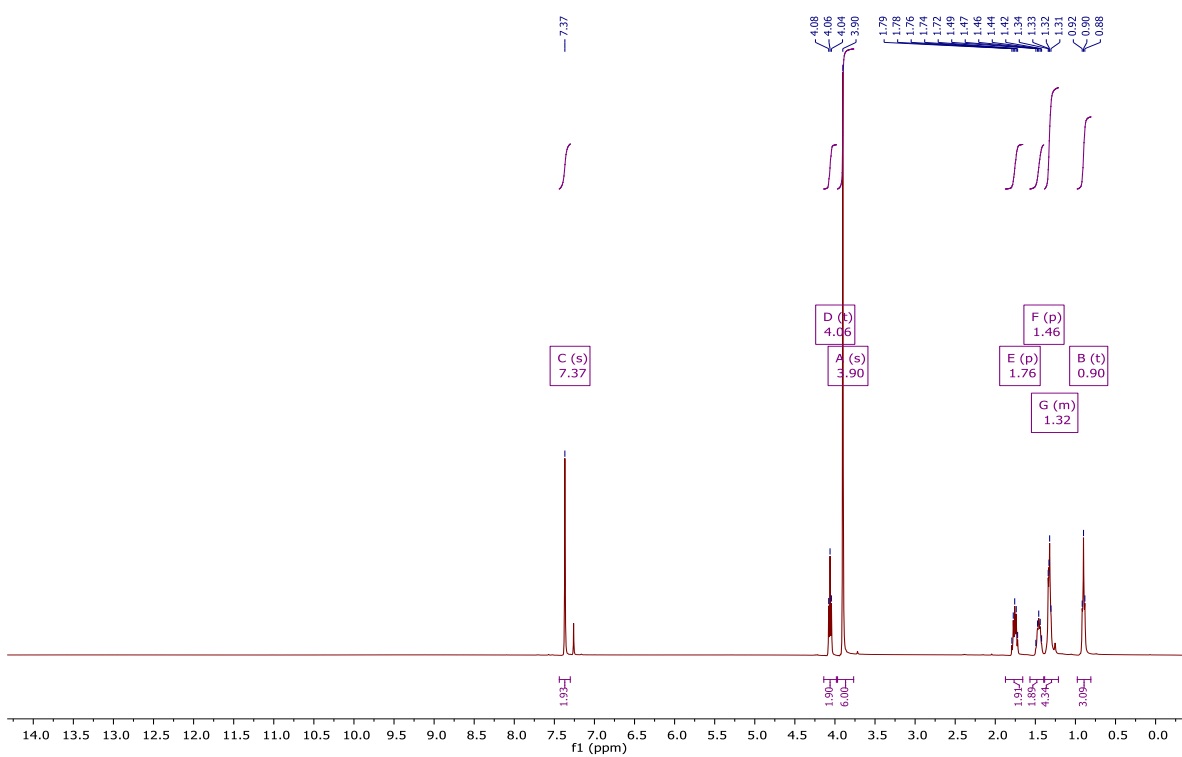

**Figure S14.**  $^1\text{H}$ -NMR spectrum of syringic acid 4-hexyl ether (**5d**).



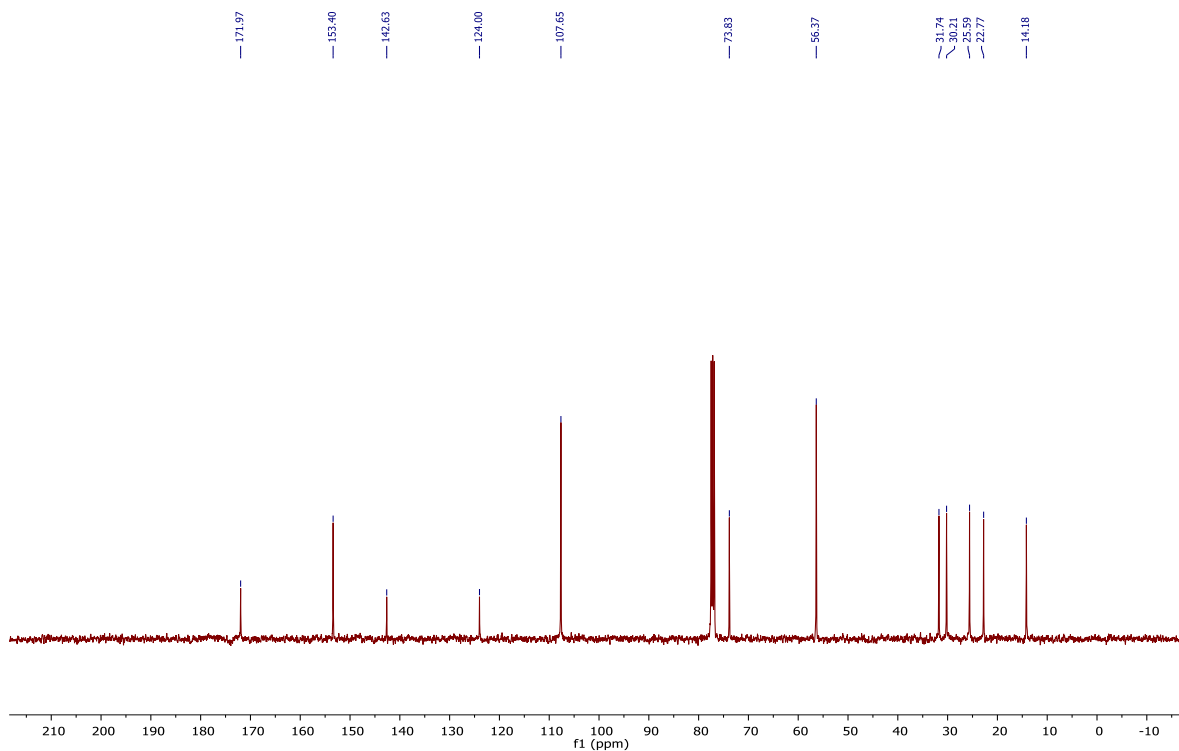

**Figure S15.**  $^{13}\text{C}$ -NMR spectrum of syringic acid 4-hexyl ether (**5d**).

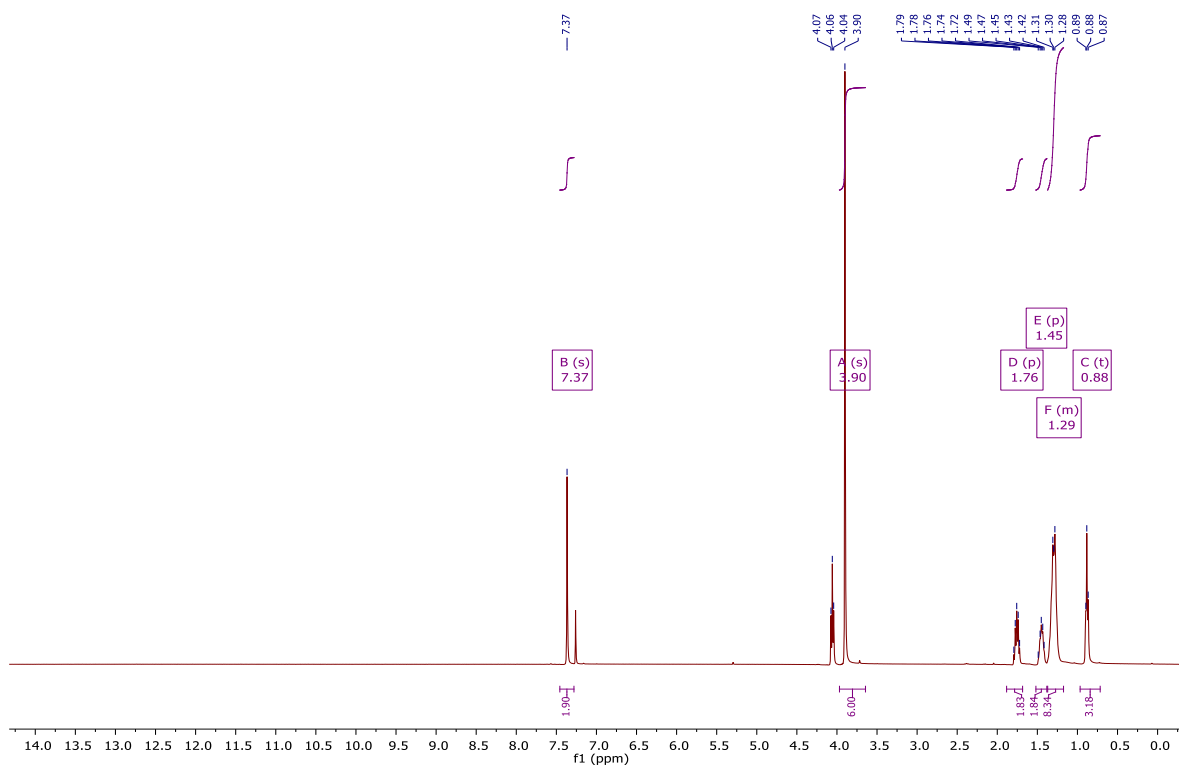

**Figure S16.**  $^1\text{H}$ -NMR spectrum of syringic acid 4-octyl ether (**5e**).

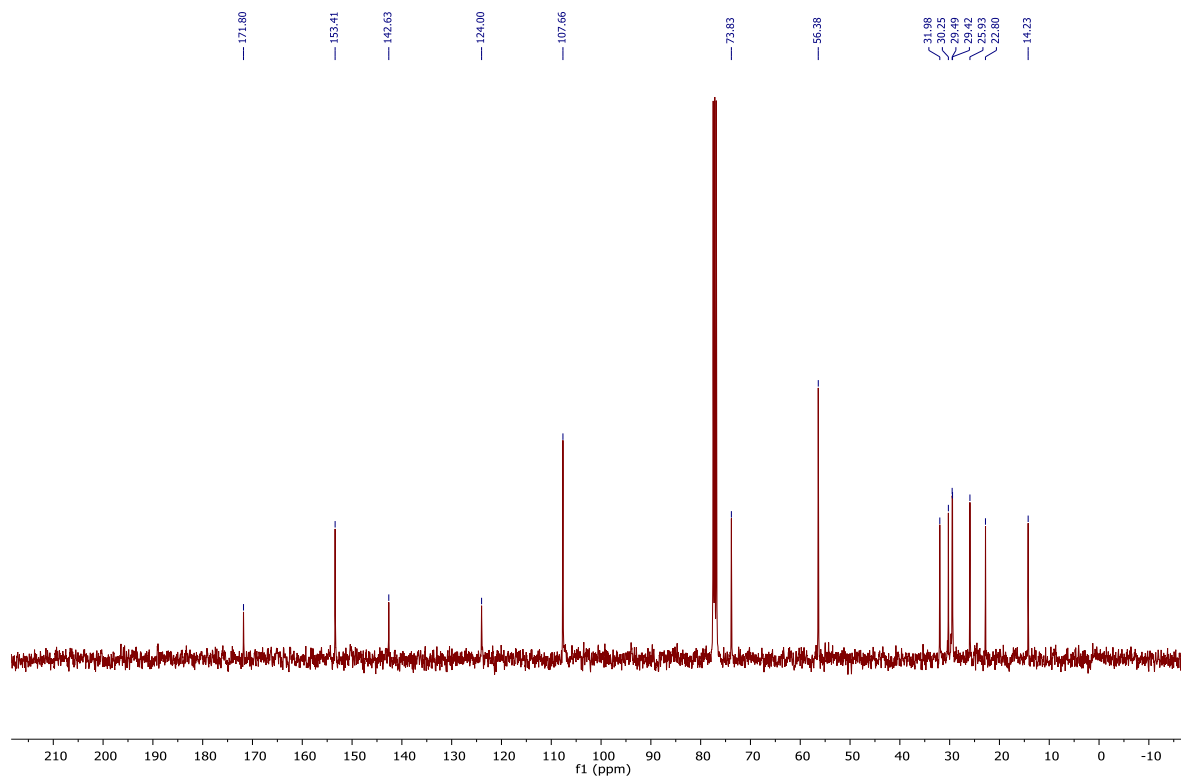

**Figure S17.**  $^{13}\text{C}$ -NMR spectrum of syringic acid 4-octyl ether (**5e**).

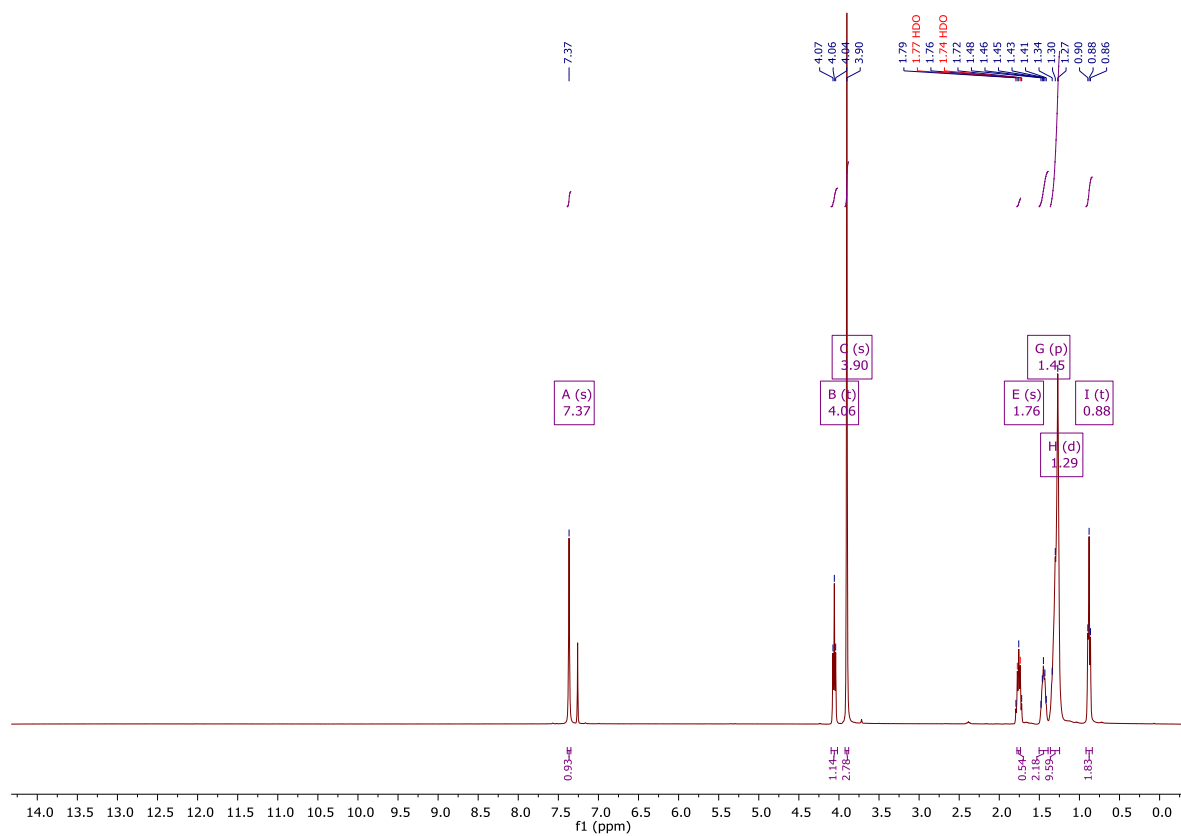

**Figure S18.**  $^1\text{H}$ -NMR spectrum of syringic acid 4-decyl ether (**5f**).

## II. Physicochemical, drug-likeness, and pharmacokinetic properties

**Table S1.** Physicochemical and drug-likeness properties of the compounds

|                                       | 1       | 3a     | 3b      | 3c      | 3d      | 3e      | 3f      | 4       | 5a      | 5b      | 5c      | 5d      | 5e      | 5f      |
|---------------------------------------|---------|--------|---------|---------|---------|---------|---------|---------|---------|---------|---------|---------|---------|---------|
| <b>Physicochemical properties</b>     |         |        |         |         |         |         |         |         |         |         |         |         |         |         |
| Molecular Weight (g/mol)              | 194.06  | 222.09 | 236.1   | 264.14  | 278.15  | 306.18  | 334.21  | 198.05  | 226.08  | 240.1   | 268.13  | 282.15  | 310.18  | 338.21  |
| Volume                                | 194.938 | 229.53 | 246.826 | 281.418 | 298.714 | 333.306 | 367.898 | 189.069 | 223.661 | 240.957 | 275.549 | 292.845 | 327.437 | 362.029 |
| Density                               | 0.995   | 0.968  | 0.957   | 0.939   | 0.931   | 0.919   | 0.908   | 1.048   | 1.011   | 0.996   | 0.973   | 0.963   | 0.947   | 0.934   |
| nHA                                   | 4       | 4      | 4       | 4       | 4       | 4       | 4       | 5       | 5       | 5       | 5       | 5       | 5       | 5       |
| nHD                                   | 2       | 1      | 1       | 1       | 1       | 1       | 1       | 2       | 1       | 1       | 1       | 1       | 1       | 1       |
| nRot                                  | 3       | 5      | 6       | 8       | 9       | 11      | 13      | 3       | 5       | 6       | 8       | 9       | 11      | 13      |
| nRing                                 | 1       | 1      | 1       | 1       | 1       | 1       | 1       | 1       | 1       | 1       | 1       | 1       | 1       | 1       |
| MaxRing                               | 6       | 6      | 6       | 6       | 6       | 6       | 6       | 6       | 6       | 6       | 6       | 6       | 6       | 6       |
| nHet                                  | 4       | 4      | 4       | 4       | 4       | 4       | 4       | 5       | 5       | 5       | 5       | 5       | 5       | 5       |
| fChar                                 | 0       | 0      | 0       | 0       | 0       | 0       | 0       | 0       | 0       | 0       | 0       | 0       | 0       | 0       |
| nRig                                  | 8       | 8      | 8       | 8       | 8       | 8       | 8       | 7       | 7       | 7       | 7       | 7       | 7       | 7       |
| Flexibility                           | 0.375   | 0.625  | 0.75    | 1.0     | 1.125   | 1.375   | 1.625   | 0.429   | 0.714   | 0.857   | 1.143   | 1.286   | 1.571   | 1.857   |
| StereoCenters                         | 0       | 0      | 0       | 0       | 0       | 0       | 0       | 0       | 0       | 0       | 0       | 0       | 0       | 0       |
| TPSA                                  | 66.76   | 55.76  | 55.76   | 55.76   | 55.76   | 55.76   | 55.76   | 75.99   | 64.99   | 64.99   | 64.99   | 64.99   | 64.99   | 64.99   |
| logS                                  | -1.761  | -3.317 | -4.003  | -4.502  | -4.647  | -4.785  | -4.86   | -1.975  | -2.684  | -3.36   | -3.917  | -4.13   | -4.334  | -4.407  |
| logP                                  | 1.803   | 2.101  | 2.606   | 3.501   | 3.876   | 4.748   | 5.691   | 1.212   | 2.018   | 2.467   | 3.357   | 3.734   | 4.561   | 5.531   |
| logD                                  | 2.724   | 1.905  | 2.596   | 3.228   | 3.458   | 3.878   | 4.074   | 3.978   | 2.412   | 2.876   | 2.88    | 3.167   | 3.725   | 4.106   |
| <b>Medicinal Chemistry properties</b> |         |        |         |         |         |         |         |         |         |         |         |         |         |         |
| QED                                   | 0.715   | 0.776  | 0.771   | 0.578   | 0.552   | 0.482   | 0.392   | 0.760   | 0.829   | 0.825   | 0.734   | 0.703   | 0.622   | 0.517   |
| SAscore                               | 1.869   | 1.749  | 1.815   | 1.826   | 1.848   | 1.896   | 1.946   | 1.726   | 1.702   | 1.762   | 1.779   | 1.804   | 1.855   | 1.909   |
| Fsp3                                  | 0.100   | 0.250  | 0.308   | 0.400   | 0.438   | 0.5     | 0.550   | 0.222   | 0.364   | 0.417   | 0.5     | 0.533   | 0.588   | 0.632   |
| MCE-18                                | 7.0     | 7.0    | 7.0     | 7.0     | 7.0     | 7.0     | 7.0     | 8.0     | 8.0     | 8.0     | 8.0     | 8.0     | 8.0     | 8.0     |
| NPscore                               | 0.926   | 0.056  | 0.113   | 0.249   | 0.29    | 0.264   | 0.242   | 0.544   | -0.021  | 0.035   | 0.18    | 0.224   | 0.204   | 0.187   |
| Lipinski Rule                         | A       | A      | A       | A       | A       | A       | A       | A       | A       | A       | A       | A       | A       | A       |
| Pfizer Rule                           | A       | A      | A       | R       | R       | R       | R       | A       | A       | A       | R       | R       | R       | R       |
| GSK Rule                              | A       | A      | A       | A       | A       | R       | R       | A       | A       | A       | A       | A       | R       | R       |

|                 |          |          |          |          |          |          |          |          |          |          |          |          |          |          |
|-----------------|----------|----------|----------|----------|----------|----------|----------|----------|----------|----------|----------|----------|----------|----------|
| Golden Triangle | R        | A        | A        | A        | A        | A        | A        | R        | A        | A        | A        | A        | A        | A        |
| PAINS           | 0 alerts |
| ALARM NMR       | 2 alerts | 1 alerts | 3 alerts | 2 alerts |
| BMS             | 0 alerts | 1 alerts | 0 alerts | 1 alerts |
| Chelator Rule   | 1 alerts | 0 alerts | 1 alerts | 0 alerts |

**Abbreviation:** A, Accepted; R, Rejected; PAINS, Pan-assay interference compounds, ALARM NMR, a La assay to detect reactive molecules by nuclear magnetic resonance; QED, measure of drug-likeness based on the concept of desirability; SAscore, Synthetic accessibility score, NPscore, Natural Product-likeness score; BMS, Undesirable, reactive compounds.

**Table S2.** Pharmacokinetics properties of the compounds

|                                     | 1       | 3a      | 3b      | 3c      | 3d      | 3e      | 3f      | 4       | 5a      | 5b      | 5c      | 5d      | 5e      | 5f      |
|-------------------------------------|---------|---------|---------|---------|---------|---------|---------|---------|---------|---------|---------|---------|---------|---------|
| <b>Absorption properties</b>        |         |         |         |         |         |         |         |         |         |         |         |         |         |         |
| Caco-2 Permeability (log cm/s)      | -4.902  | -4.604  | -4.631  | -4.678  | -4.702  | -4.736  | -4.768  | -5.142  | -4.707  | -4.660  | -4.647  | -4.648  | -4.664  | -4.678  |
| MDCK Permeability                   | 1.5e-05 | 1.2e-05 | 1.4e-05 | 2.2e-05 | 2.6e-05 | 3.1e-05 | 3.1e-05 | 1.1e-05 | 1.4e-05 | 1.2e-05 | 2.1e-05 | 2.4e-05 | 2.5e-05 | 2.5e-05 |
| P-glycoprotein <sub>inhibitor</sub> | 0.0     | 0.001   | 0.001   | 0.002   | 0.004   | 0.03    | 0.146   | 0.002   | 0.006   | 0.005   | 0.023   | 0.06    | 0.414   | 0.844   |
| P-glycoprotein <sub>substrate</sub> | 0.086   | 0.711   | 0.843   | 0.822   | 0.777   | 0.648   | 0.464   | 0.003   | 0.001   | 0.005   | 0.019   | 0.031   | 0.052   | 0.034   |
| HIA                                 | 0.03    | 0.005   | 0.005   | 0.005   | 0.005   | 0.005   | 0.005   | 0.028   | 0.003   | 0.003   | 0.003   | 0.003   | 0.003   | 0.003   |
| F20%                                | 0.047   | 0.002   | 0.003   | 0.005   | 0.018   | 0.700   | 0.975   | 0.011   | 0.005   | 0.006   | 0.004   | 0.005   | 0.023   | 0.840   |
| F30%                                | 0.584   | 0.327   | 0.271   | 0.036   | 0.029   | 0.148   | 0.87    | 0.067   | 0.007   | 0.006   | 0.009   | 0.013   | 0.043   | 0.222   |
| <b>Distribution properties</b>      |         |         |         |         |         |         |         |         |         |         |         |         |         |         |
| PPB (%)                             | 89.75   | 87.03   | 90.00   | 94.68   | 96.12   | 97.98   | 98.97   | 50.89   | 50.45   | 60.70   | 87.47   | 93.34   | 96.87   | 97.67   |
| VD (L/kg)                           | 0.339   | 0.207   | 0.22    | 0.207   | 0.214   | 0.259   | 0.332   | 0.459   | 0.354   | 0.385   | 0.312   | 0.287   | 0.269   | 0.274   |
| BBB                                 | 0.329   | 0.243   | 0.242   | 0.233   | 0.215   | 0.165   | 0.125   | 0.457   | 0.498   | 0.417   | 0.311   | 0.249   | 0.155   | 0.11    |
| Fu (%)                              | 6.394   | 5.545   | 4.766   | 2.888   | 2.130   | 1.243   | 0.879   | 38.56   | 30.15   | 26.29   | 11.72   | 6.815   | 3.234   | 2.112   |
| <b>Metabolism properties</b>        |         |         |         |         |         |         |         |         |         |         |         |         |         |         |
| P450 CYP1A2 <sub>inhibitor</sub>    | 0.059   | 0.285   | 0.350   | 0.543   | 0.592   | 0.625   | 0.588   | 0.032   | 0.088   | 0.111   | 0.185   | 0.248   | 0.360   | 0.360   |
| P450 CYP1A2 <sub>substrate</sub>    | 0.478   | 0.633   | 0.737   | 0.766   | 0.754   | 0.634   | 0.445   | 0.911   | 0.910   | 0.916   | 0.913   | 0.908   | 0.894   | 0.859   |
| P450 CYP3A4 <sub>inhibitor</sub>    | 0.042   | 0.053   | 0.057   | 0.103   | 0.123   | 0.173   | 0.294   | 0.025   | 0.034   | 0.036   | 0.056   | 0.068   | 0.105   | 0.168   |
| P450 CYP3A4 <sub>substrate</sub>    | 0.057   | 0.062   | 0.063   | 0.067   | 0.078   | 0.114   | 0.120   | 0.058   | 0.106   | 0.169   | 0.341   | 0.444   | 0.535   | 0.509   |
| P450 CYP2C9 <sub>inhibitor</sub>    | 0.142   | 0.05    | 0.102   | 0.443   | 0.551   | 0.606   | 0.498   | 0.028   | 0.033   | 0.057   | 0.228   | 0.346   | 0.497   | 0.474   |
| P450 CYP2C9 <sub>substrate</sub>    | 0.367   | 0.766   | 0.779   | 0.840   | 0.871   | 0.921   | 0.950   | 0.131   | 0.231   | 0.220   | 0.261   | 0.299   | 0.394   | 0.547   |
| P450 CYP2C19 <sub>inhibitor</sub>   | 0.02    | 0.028   | 0.028   | 0.043   | 0.052   | 0.082   | 0.139   | 0.012   | 0.011   | 0.012   | 0.020   | 0.024   | 0.038   | 0.060   |
| P450 CYP2C19 <sub>substrate</sub>   | 0.199   | 0.356   | 0.467   | 0.466   | 0.488   | 0.533   | 0.530   | 0.141   | 0.149   | 0.149   | 0.148   | 0.146   | 0.142   | 0.136   |
| P450 CYP2D6 <sub>inhibitor</sub>    | 0.026   | 0.022   | 0.022   | 0.020   | 0.021   | 0.036   | 0.061   | 0.016   | 0.015   | 0.017   | 0.023   | 0.027   | 0.043   | 0.066   |
| P450 CYP2D6 <sub>substrate</sub>    | 0.075   | 0.108   | 0.091   | 0.091   | 0.086   | 0.077   | 0.062   | 0.071   | 0.146   | 0.110   | 0.090   | 0.079   | 0.060   | 0.046   |
| <b>Excretion properties</b>         |         |         |         |         |         |         |         |         |         |         |         |         |         |         |
| CL (mL/min/kg)                      | 7.48    | 5.042   | 6.754   | 5.082   | 4.251   | 2.991   | 2.622   | 7.208   | 5.499   | 6.362   | 5.227   | 4.646   | 3.724   | 3.139   |
| T <sub>1/2</sub> (h)                | 0.926   | 0.873   | 0.849   | 0.797   | 0.74    | 0.606   | 0.446   | 0.946   | 0.918   | 0.906   | 0.891   | 0.875   | 0.826   | 0.738   |
| <b>Toxicity properties</b>          |         |         |         |         |         |         |         |         |         |         |         |         |         |         |
| hERG Blockers                       | 0.023   | 0.018   | 0.024   | 0.040   | 0.050   | 0.075   | 0.127   | 0.034   | 0.072   | 0.092   | 0.113   | 0.125   | 0.168   | 0.227   |
| H-HT                                | 0.345   | 0.112   | 0.100   | 0.073   | 0.056   | 0.041   | 0.034   | 0.154   | 0.129   | 0.084   | 0.070   | 0.064   | 0.054   | 0.045   |
| DILI                                | 0.511   | 0.927   | 0.909   | 0.845   | 0.817   | 0.748   | 0.706   | 0.795   | 0.885   | 0.863   | 0.857   | 0.870   | 0.891   | 0.907   |

|                         |       |       |       |       |       |       |       |       |       |       |       |       |       |       |
|-------------------------|-------|-------|-------|-------|-------|-------|-------|-------|-------|-------|-------|-------|-------|-------|
| AMES Mutagenicity       | 0.114 | 0.018 | 0.010 | 0.007 | 0.006 | 0.006 | 0.005 | 0.009 | 0.008 | 0.005 | 0.003 | 0.003 | 0.003 | 0.002 |
| Rat Oral Acute Toxicity | 0.733 | 0.015 | 0.023 | 0.021 | 0.020 | 0.018 | 0.016 | 0.011 | 0.007 | 0.009 | 0.011 | 0.012 | 0.013 | 0.013 |
| FDAMDD                  | 0.076 | 0.012 | 0.011 | 0.011 | 0.011 | 0.010 | 0.009 | 0.023 | 0.020 | 0.019 | 0.019 | 0.018 | 0.017 | 0.016 |
| Skin Sensitization      | 0.929 | 0.675 | 0.77  | 0.908 | 0.930 | 0.945 | 0.952 | 0.129 | 0.106 | 0.110 | 0.185 | 0.221 | 0.373 | 0.660 |
| Carcinogenicity         | 0.443 | 0.689 | 0.569 | 0.410 | 0.335 | 0.221 | 0.144 | 0.034 | 0.055 | 0.037 | 0.047 | 0.055 | 0.052 | 0.049 |
| Eye Corrosion           | 0.515 | 0.055 | 0.097 | 0.125 | 0.129 | 0.137 | 0.145 | 0.292 | 0.025 | 0.017 | 0.021 | 0.021 | 0.021 | 0.023 |
| Eye Irritation          | 0.979 | 0.941 | 0.915 | 0.910 | 0.91  | 0.905 | 0.899 | 0.977 | 0.923 | 0.824 | 0.809 | 0.804 | 0.793 | 0.785 |
| Respiratory Toxicity    | 0.720 | 0.137 | 0.177 | 0.358 | 0.451 | 0.555 | 0.599 | 0.044 | 0.022 | 0.026 | 0.042 | 0.062 | 0.158 | 0.367 |

**Abbreviations:** HIA, Human intestinal absorption; F<sub>20%</sub>, Human oral bioavailability 20%; F<sub>30%</sub>, Human oral bioavailability 30%; PPB, Plasma protein binding; VD, Volume distribution; BBB, Blood brain barrier; Fu, Fraction unbound in plasm; CL, Clearance; T<sub>1/2</sub>, Half-life; H-HT, Human hepatotoxicity; DILI, Drug induced liver injury; FDAMDD, FDA maximum (recommended) daily dose.
